# Supplementary material for: Management of Common Medical Conditions by Office-Based Psychiatrists
Source: Atypon-hosted journal article supplement (doi:10.1176/appi.ps.201700255), 2017-12-01
Supplement: appi.ps.201700255.ds001.pdf [file appi.ps.201700255.ds001.pdf]

 


Psychiatry Online
