# Supplementary material for: Management of Common Medical Conditions by Office-Based Psychiatrists
Source: Atypon-hosted journal article supplement (doi:10.1176/appi.ps.201700255), 2017-12-01
Supplement: appi.ps.201700255.ds001.pdf [file appi.ps.201700255.ds001.pdf]

**Appendix Table:** The medications groups and subgroups for physical health conditions included in the study.

| <b>Medication group</b>                     | <b>Medication sub-groups</b>                                                                                                                                                                                                                                            |
|---------------------------------------------|-------------------------------------------------------------------------------------------------------------------------------------------------------------------------------------------------------------------------------------------------------------------------|
| Antihypertensive medications                | Beta-blockers<br>Diuretics<br>Angiotensin converting enzyme inhibitors<br>Angiotensin II receptor blockers<br>Peripherally and centrally acting anti-adrenergic agents<br>Calcium channel blockers<br>Renin inhibitors<br>Aldosterone receptor agonists<br>Vasodilators |
| Medications for treatment of hyperlipidemia | Statins<br>Cholesterol absorption inhibitors<br>Bile acid sequestrants<br>Fibric acid derivatives                                                                                                                                                                       |
| Anti-diabetic medications                   | Sulfonylureas<br>Biguanides<br>Alpha-glucosidase inhibitors<br>Thiazolidinediones<br>Meglitinides<br>Dipeptidyl peptidase 4 inhibitors<br>Amylin analogs<br>Incretin mimetics<br>Insulin                                                                                |
